# Supplementary material for: Importance of spin-triplet excited-state character in the reverse intersystem crossing process of spiro-based TADF emitters
Source: Royal Society of Chemistry journal article supplement (doi:10.1039/d2tc05402g), 2023-01-01

## Supporting Information

### **Importance of spin-triplet excited-state character on the reverse intersystem crossing process of the spiro-based TADF emitters**

Jiaqi Li, Tian Tian, Dongxue, Guo, Tingyu Li, Mingfan Zhang, and Houyu Zhang\*

*State key laboratory of supramolecular structure and materials,*

*Institute of theoretical chemistry, College of Chemistry, Jilin university,*

*Changchun 130012, P.R. China*

\*Email: [hoyuzhang@jlu.edu.cn](mailto:hoyuzhang@jlu.edu.cn)

# Contents

**Table S1.** Calculated HOMO energies of molecule **1** with different DFT functionals.

**Table S2.** Calculated absorption and emission wavelengths of molecule **1** with different functionals.

**Table S3.** Calculated dihedral angles and the changes between any two different states for the investigated molecules.

**Table S4.** Calculated HOMO and LUMO levels of the donor and acceptor fragments.

**Table S5.** Calculated related energies about the reorganization energies for the RISC process.

**Table S6.** Calculated ratio of population in T<sub>1</sub> and T<sub>2</sub> states.

**Table S7.** Calculated emission oscillator strength of S<sub>1</sub> states ( $f(S_1)$ ), emission energy of T<sub>1</sub> states ( $\Delta E_{em}(T_1)$ , eV), the transition energy difference between the S<sub>1</sub>→S<sub>0</sub> and T<sub>1</sub>→S<sub>0</sub> transitions ( $\Delta E(S_1 - T_1)$ , eV), and SOC constant ( $\langle T_1 | H_{SOC} | S_1 \rangle$ , cm<sup>-1</sup>) for the investigated molecules.

**Fig. S1** Schematic diagram of the potential energy surfaces and computational details about TADF.

**Fig. S2** Optimized geometrical structures of the investigated molecules.

**Fig. S3** FMO plots of the orbitals involved in the exciton transitions for the investigated molecules.

**Fig. S4** NTO analysis for S<sub>1</sub>, T<sub>1</sub>, and T<sub>2</sub> states of the investigated molecules.

**Table S1.** Calculated HOMO energies of molecule **1** with different DFT functionals with a fixed percentage of nonlocal Hartree-Fock exchange ( $\text{HF}_{\text{exc}}$ ).

| $\text{HF}_{\text{exc}}$ | <b>B3LYP</b><br>20% | <b>PBE0</b><br>25% | <b>BMK</b><br>42% | <b>CAM-B3LYP</b><br>19% at SR and 65% at LR | Exptl. <sup>a</sup> |
|--------------------------|---------------------|--------------------|-------------------|---------------------------------------------|---------------------|
| <b>HOMO (eV)</b>         | -5.18               | -5.42              | -5.87             | -6.47                                       | -5.53               |

<sup>a</sup>Exptl: from ref. 47.

**Table S2.** Calculated absorption wavelength ( $\lambda_{\text{abs}}$ ) of molecule **1** in dichloromethane solution and the emission wavelength ( $\lambda_{\text{em}}$ ) in toluene solution with different DFT functionals with a fixed percentage of nonlocal Hartree-Fock exchange ( $\text{HF}_{\text{exc}}$ ).

| $\text{HF}_{\text{exc}}$    | <b>B3LYP</b><br>20% | <b>PBE0</b><br>25% | <b>BMK</b><br>42% | <b>CAM-B3LYP</b><br>19% at SR and 65% at LR | Exptl. <sup>a</sup> |
|-----------------------------|---------------------|--------------------|-------------------|---------------------------------------------|---------------------|
| $\lambda_{\text{abs}}$ (nm) | 535                 | 496                | 406               | 351                                         | 400                 |
|                             | 368                 | 350                | 312               | 295                                         | 320                 |
| $\lambda_{\text{em}}$ (nm)  | 682                 | 622                | 496               | 411                                         | 520                 |

<sup>a</sup>Exptl: from ref. 47.

**Table S3.** Calculated dihedral angles ( $\alpha$  as indicated in Fig. 2, in degree) in the ground and excited states and the changes of twisted angles between any two different states ( $\Delta\alpha$ ) for the investigated molecules.

|          | <b>S<sub>0</sub></b> | <b>S<sub>1</sub></b> | <b>T<sub>1</sub></b> | <b> S<sub>1</sub>-S<sub>0</sub> </b> | <b> T<sub>1</sub>-S<sub>0</sub> </b> | <b> T<sub>1</sub>-S<sub>1</sub> </b> |
|----------|----------------------|----------------------|----------------------|--------------------------------------|--------------------------------------|--------------------------------------|
| <b>1</b> | 66.5                 | 65.9                 | 68.5                 | 0.6                                  | 2.0                                  | 2.6                                  |
| <b>2</b> | 66.2                 | 66.7                 | 67.6                 | 0.5                                  | 1.4                                  | 0.9                                  |
| <b>3</b> | 87.2                 | 85.3                 | 83.9                 | 1.9                                  | 3.3                                  | 1.4                                  |
| <b>4</b> | 85.3                 | 89.8                 | 89.9                 | 4.5                                  | 4.6                                  | 0.1                                  |
| <b>5</b> | 67.4                 | 68.6                 | 67.5                 | 1.2                                  | 0.1                                  | 1.1                                  |
| <b>6</b> | 88.7                 | 84.8                 | 87.1                 | 3.9                                  | 1.6                                  | 2.3                                  |

**Table S4.** Calculated HOMO and LUMO levels of the donor fragments **1d** and **2d**, and acceptor units **1a**, **2a**, and **3a** at the PBE0/6-31G(d, p) level.

|           | Structure                                                                          | HOMO                                                                               |          | LUMO                                                                                 |          |
|-----------|------------------------------------------------------------------------------------|------------------------------------------------------------------------------------|----------|--------------------------------------------------------------------------------------|----------|
| <b>1a</b> | 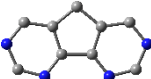  |   | -7.36 eV |   | -2.14 eV |
| <b>2a</b> |   |   | -7.31 eV |   | -2.19 eV |
| <b>3a</b> |   |   | -7.00 eV |   | -2.27 eV |
| <b>1d</b> |   |   | -5.04 eV |   | -0.33 eV |
| <b>2d</b> |  |  | -4.82 eV |  | -0.49 eV |

**Table S5.** Calculated related energies about the reorganization energies for the RISC process.

|          | $E_s$ ( $S_1$ -geometry) | $E_s$ ( $T_1$ -geometry) | $\lambda$ (hartree) | $\lambda$ (eV) |
|----------|--------------------------|--------------------------|---------------------|----------------|
| <b>1</b> | -1506.19537546           | -1506.18608110           | 0.00929436          | 0.253          |
| <b>2</b> | -1446.07948599           | -1446.07924422           | 0.00024177          | 0.007          |
| <b>3</b> | -1580.20418594           | -1580.20399119           | 0.00019475          | 0.005          |
| <b>4</b> | -1520.08811430           | -1520.08794455           | 0.00016975          | 0.004          |
| <b>5</b> | -1385.95612932           | -1385.95586249           | 0.00026683          | 0.008          |
| <b>6</b> | -1459.96528452           | -1459.95057405           | 0.01471047          | 0.400          |

**Table S6.** Calculated ratio of population in  $T_1$  and  $T_2$  states.

| Mol.                        | 1    | 2    | 3     | 4   | 5     | 6   | 2S   | 5S   |
|-----------------------------|------|------|-------|-----|-------|-----|------|------|
| <b><math>T_2:T_1</math></b> | 71:1 | 26:1 | 126:1 | 8:1 | 101:1 | 3:1 | 53:1 | 20:1 |

**Table S7.** Calculated emission oscillator strength of S<sub>1</sub> states ( $f(S_1)$ ), emission energy of T<sub>1</sub> states ( $\Delta E_{em}(T_1)$ , eV), the transition energy difference between the S<sub>1</sub>→S<sub>0</sub> and T<sub>1</sub>→S<sub>0</sub> transitions ( $\Delta E(S_1 - T_1)$ , eV), and SOC constant ( $\langle T_1 | H_{SOC} | S_1 \rangle$ , cm<sup>-1</sup>) for the investigated molecules.

| Mol.      | $f(S_1)$ | $\Delta E_{em}(T_1)$ | $\Delta E_{em}(T_1)^3$ | $\Delta E(S_1-T_1)$ | $\langle T_1   H_{SOC}   S_1 \rangle$ |
|-----------|----------|----------------------|------------------------|---------------------|---------------------------------------|
| <b>2</b>  | 0.0004   | 2.516                | 15.927                 | 0.015               | 0.012                                 |
| <b>2S</b> | 0.0005   | 2.536                | 16.310                 | 0.026               | 0.080                                 |
| <b>5</b>  | 0.0007   | 2.558                | 16.738                 | 0.018               | 0.015                                 |
| <b>5S</b> | 0.0008   | 2.526                | 16.118                 | 0.106               | 0.165                                 |

**Comments on the  $k_p$  for molecules **2**, **2S**, **5**, and **5S**:**

For molecules **2**, **2S**, **5**, and **5S**, the introduction of sulfur atom will lead to the increase of SOC which is favorable to increasing  $k_p$ . However, the calculated  $k_p$  for **5S** is lower than **5**. Since the  $k_p$  depends not only on the SOC, but also the  $f(S_n)$ ,  $E(T_1)$ , and  $\Delta E(S_n-T_1)$ . We can understand this from  $k_p$  expression from the T<sub>1</sub> state to the S<sub>0</sub> state as follows:

$$k_p^\alpha(T_1 \rightarrow S_0) = \frac{16 \times 10^6 \pi^3 \eta^3 E(T_1)^3}{3 \epsilon_0 h} \left[ \sum_n \frac{\langle T_1^\alpha | H_{SOC} | S_n \rangle}{\Delta E(S_n - T_1)} \right] \mu(S_n)$$

The relevant physical quantities (Table S7) are closely related to the  $k_p$  values for the emissive triplet state T<sub>1</sub>, such as  $f(S_n)$ ,  $E(T_1)$ ,  $\Delta E(S_n-T_1)$ , and  $\langle T_1 | H_{SOC} | S_n \rangle$ . The values of  $f(S_n)$ ,  $\Delta E(S_n-T_1)$  and  $\langle T_1 | H_{SOC} | S_n \rangle$  become larger with the introduction of sulfur atom, which are different from the value of  $\Delta E_{em}(T_1)$ . Although molecule **5** has a small SOC constant, the small  $\Delta E(S_n-T_1)$  value, large  $\Delta E_{em}(T_1)$ , and similar  $f(S_1)$  are beneficial to gain a large  $k_p$ . On the contrary, a small  $\Delta E_{em}(T_1)$  of **5S** lead to a lower  $k_p$  in comparison to **5**. Thus, the  $\Delta E_{em}(T_1)$  is the main influencing factor of molecule **5S**.

**Fig. S1** Schematic diagram of the potential energy surfaces and computational details about TADF.

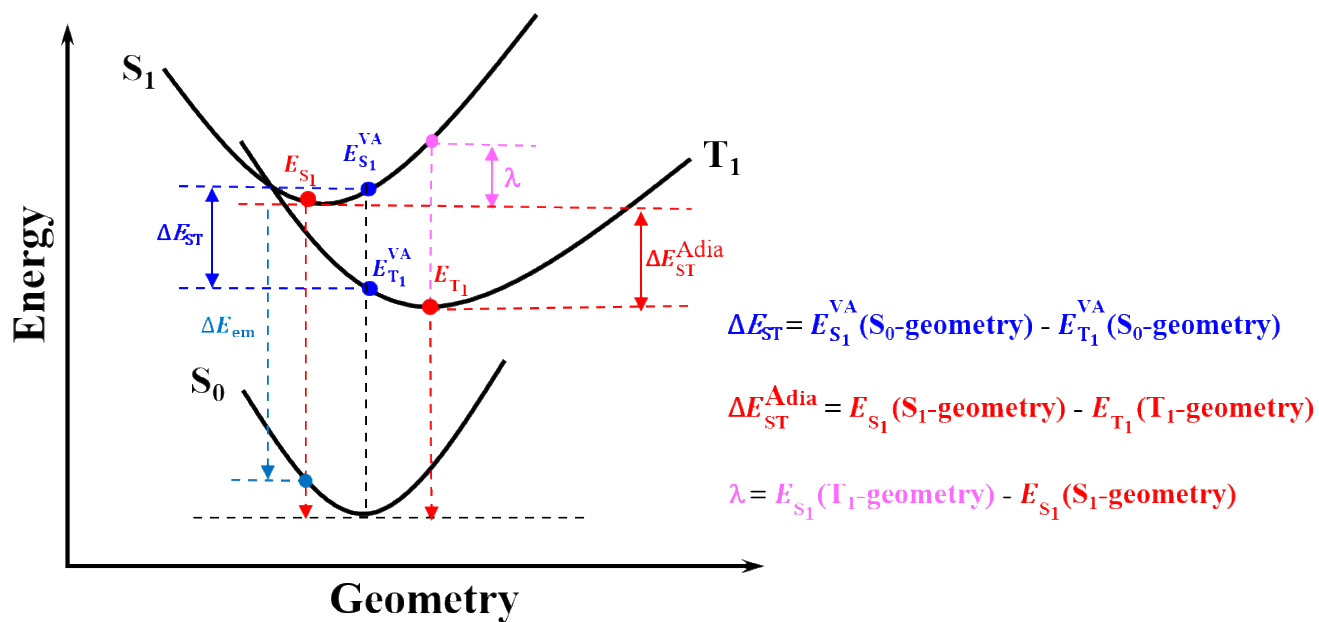

**Fig. S2** Structural changes between the optimized structures of S<sub>0</sub> and S<sub>1</sub>, S<sub>0</sub> and T<sub>1</sub>, and S<sub>1</sub> and T<sub>1</sub> states (S<sub>0</sub>, S<sub>1</sub>, and T<sub>1</sub> structures are depicted in grey, red, and blue, respectively). Root mean square displacement ( $\text{RMSD} = \sqrt{\frac{1}{N} \sum_i^{\text{atom}} [(x_i - x'_i)^2 + (y_i - y'_i)^2 + (z_i - z'_i)^2]}$ ) between S<sub>1</sub> and T<sub>1</sub> states.

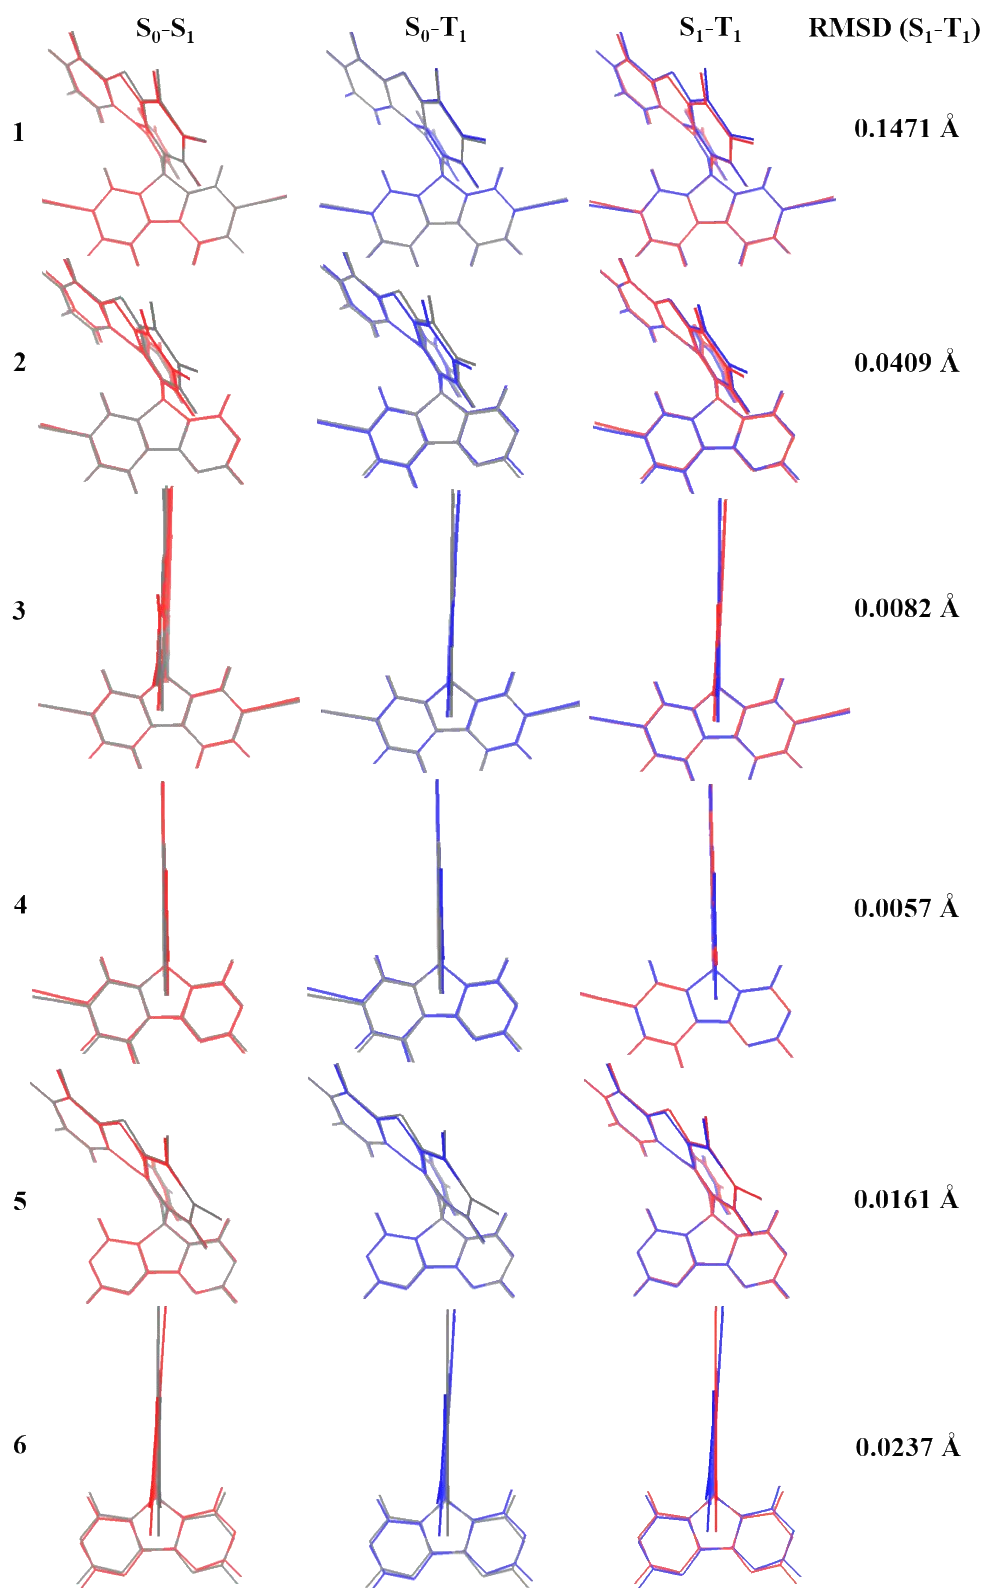

**Fig. S3** FMO plots of the orbitals involved in the exciton transitions for the investigated molecules.

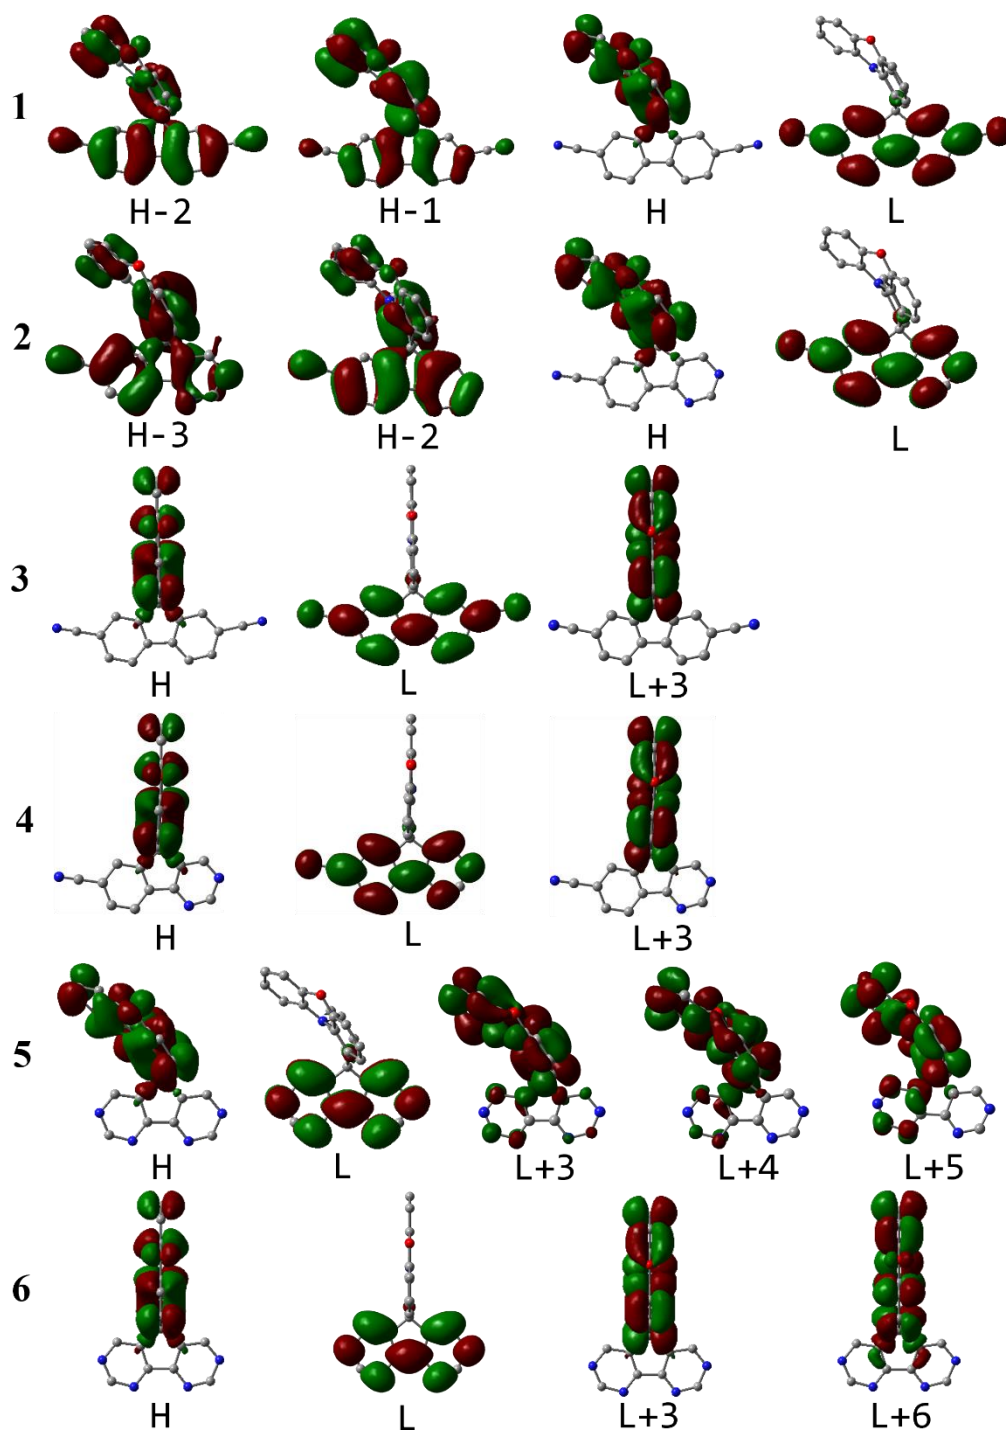



**Fig. S4** NTO analysis for  $S_1$ ,  $T_1$ , and  $T_2$  states of the investigated molecules.

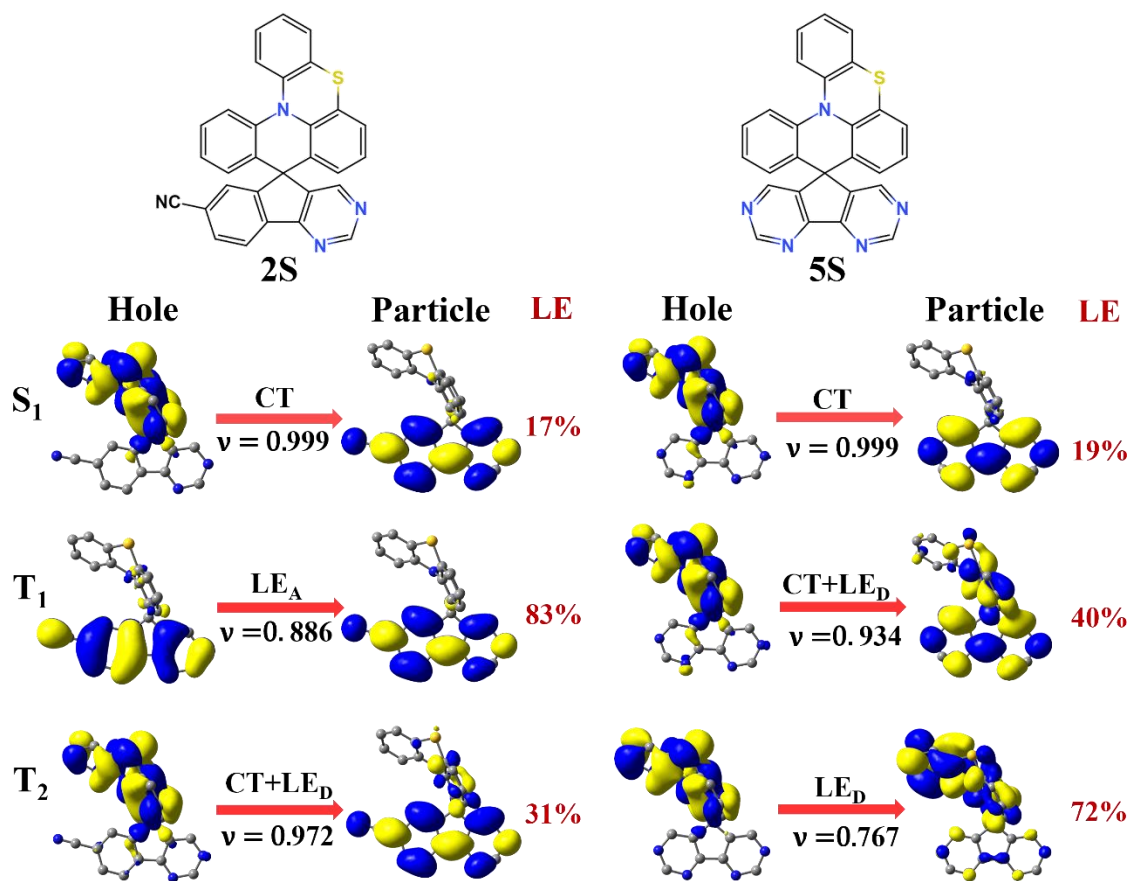

Supplement: d2tc05402g1.pdf [file d2tc05402g1.pdf]
